1

2

3

4 Muscle fibre size optimisation provides flexibility to energy budgeting in calorie-restricted Coho  
5 salmon transgenic for growth hormone

6

7

8 Ian A. Johnston<sup>1</sup>, Daniel Garcia de la serrana<sup>1</sup> and Robert H. Devlin<sup>2</sup>

9

10

11

12 <sup>1</sup> Scottish Oceans Institute, School of Biology, University of St Andrews, St Andrews, KY16 8LB,  
13 UK

14

15 <sup>2</sup> Fisheries and Oceans Canada, 4160 Marine Drive, West Vancouver, BC, V7V 1N6, Canada

16

17

18

19

20 Running title: Myogenesis in GH-transgenic salmon

21 Key words: Growth, myotube formation, transgenesis, optimal fibre size hypothesis

22

23 **ABSTRACT**

24 Coho salmon (*Oncorhynchus kisutch*) transgenic for growth hormone (GH) show substantially faster  
25 growth than wild-type (WT) fish. We fed GH-transgenic salmon either to satiation (1-year) (TF) or  
26 the same smaller ration of wild-type fish (2-years) (TR), resulting in groups matched for body size to  
27 WT salmon. The myotomes of TF and WT fish had the same number and size distribution of muscle  
28 fibres, indicating 2-fold higher rate of fibre recruitment in the *GH*-transgenics. Unexpectedly, calorie  
29 restriction was found to decrease the rate of fibre production in transgenics, resulting in a 20%  
30 increase in average fibre size and reduced costs of ionic homeostasis. Genes for myotube formation  
31 were down-regulated in TR relative to TF and WT fish. We suggest muscle fibre size optimisation  
32 allows the relocation of energy from maintenance to locomotion explaining the observation that  
33 calorie-restricted transgenics grow at the same rate as WT whilst exhibiting markedly higher foraging  
34 activity.

35

36

## 37 INTRODUCTION

38 Growth hormone (GH) has pervasive effects on growth rate, behaviour, feeding, metabolism,  
39 osmoregulation, smoltification and immunity in fish (Björnsson, 1997). Growth rate is substantially  
40 higher in *GH*-transgenic salmonid fish than in wild-type (WT), although the effects vary with  
41 promoter type and family origin (Leggatt et al., 2012). Fast growth in transgenics is associated with  
42 markedly higher appetite and feeding motivation than WT fish (Sundstrom et al., 2003).

43 GH binds to receptors in the liver and induces insulin-like growth factor-1 (IGF1) synthesis which is  
44 secreted into the general circulation, promoting growth in peripheral tissues such as skeletal muscle  
45 (Johnston et al., 2011). Binding of IGF1 to its receptor activates several downstream signaling  
46 cascades including the PI3K-Akt-TOR pathway to stimulate protein synthesis and inhibit protein  
47 degradation by the ubiquitin proteasome pathway (Johnston et al., 2011).

48 Primary effects of *GH*-transgenesis can be distinguished from secondary effects linked to appetite by  
49 comparing transgenics fed either to satiation (TF) or with the reduced ration (TR) of WT fish,  
50 producing groups of the same body size. *GH*-transgenic coho salmon (*Oncorhynchus kisutch*) fed to  
51 satiation had higher plasma GH and increased levels of tissue GH relative to WT (Raven et al., 2008).  
52 Plasma GH levels were higher still in TR fish whereas plasma and tissue IGF-1 concentrations were  
53 similar in TR and WT groups, reflecting similar feeding and growth rates (Raven et al., 2008). TR fish  
54 also maintain a much higher feeding motivation and are more active than WT fish (Sundstrom et al.,  
55 2003).

56 Teleosts recruit muscle fibres until they reach around 40-50% of the maximum adult size (Johnston et  
57 al., 2011). One report suggested that muscle in *GH*-transgenic coho salmon grew more by hyperplasia  
58 than hypertrophy than in WT fish (Hill et al., 2000), although in this study fibre number was not  
59 estimated. In order to test the hypothesis that *GH*-transgenesis enhances hyperplastic muscle growth  
60 we compared fibre number and diameter in WT, TF and TR groups of the same body length and  
61 measured expression of *gh*, *igf1* and genes required for myotube formation.

62

## 63 RESULTS AND DISCUSSION

64 TF coho salmon had a higher appetite and grew faster than WT recruiting fast muscle fibres at twice  
65 the rate, but showed a similar contribution of hyperplasia and hypertrophy to reach a given body  
66 length resulting in a similar average muscle fibre size (Supplementary Table 1; Fig. 1A,B) i.e. the  
67 hypothesis of an increased importance of hyperplasia in these transgenics was not supported (Hill et  
68 al., 2000). Unexpectedly, TR recruited 49% fewer fibres than WT on the same feeding regime and  
69 59% fewer fibres than TF (Supplementary Table 1; Fig. 1B) ( $P < 0.05$ ). Since there were only

70 relatively small and not statistically significant differences in total muscle cross-sectional area  
71 between groups (Supplementary Table 1), this result reflects a greater contribution of fibre  
72 hypertrophy to growth in TR. The average fibre diameter (FD) was 20% greater in TR (49  $\mu\text{m}$ ) than  
73 TF and WT groups (41  $\mu\text{m}$ ) (Supplementary Table 1). We fitted probability density functions (PDF)  
74 to the distributions of FD and compared specific percentiles using Multi-Wilcoxon tests. The average  
75 PDF of the TR group was significantly different from the TF and WT groups (Kolmogorov-Smirnoff)  
76 ( $P < 0.05$ ). TR had larger diameter fibres across the whole range of fibre sizes i.e. increased  
77 hypertrophy was evident for cohorts of fibres with different birthdays (Fig. 1C and D). Growth  
78 hormone (*gh*) mRNA levels (Fig. 2A) were similar in TF and TR fish and massively higher than in  
79 WT fish as expected ( $P < 0.01$ ). In contrast *igf1* expression in muscle was significantly higher in TF  
80 than WT ( $P < 0.05$ ) reflecting higher food intake and growth (Sundstrom et al., 2003), whereas WT and  
81 TR were not significantly different from each other. The expression, of genes required for myoblast  
82 fusion during hyperplastic growth including *dock1*, *dock5*, *crkl*, *itgb1*, *cadh15* and *tmem8c* were 2 to  
83 4-fold downregulated in TR relative to the other groups ( $P < 0.05$ ) (gene names are given in full in  
84 Supplementary Table 2).

85 Muscle fibre size is under strong evolutionary selection in fish and can be adjusted by altering the  
86 lifetime production of muscle fibres (Johnston et al., 2003). ATP-dependent ion pumping counteracts  
87 passive ion leak across the sarcolemmal membrane so that the energy cost of maintaining a negative  
88 resting membrane potential is proportional to fibre surface/volume (S/V) ratio. Thus large fibres are  
89 cheaper to maintain than smaller ones (Johnston et al., 2012; Jimenez et al. 2013). The optimal muscle  
90 fibre size (OFS) hypothesis envisages a trade-off between minimising S/V ratio on the one hand and  
91 avoiding diffusional constraints for diffusion of gas and metabolites on the other (Johnston et al.,  
92 2012, Johnston et al., 2003). Examples of fibre size optimisation over evolutionary time scales include  
93 the radiation of Antarctic notothenioid fishes following climatic cooling, resulting in a relaxation of  
94 diffusional constraints and “giant muscle fibres” through a dramatic reduction in body-size corrected  
95 fibre number (Johnston et al., 2003). Similarly, dwarfism in land-locked salmonid and stickleback  
96 populations was associated with a large reduction in fibre number relative to the large-bodied  
97 ancestral anadromous state, enabling a similar scaling of fibre diameter to body size (Johnston et al.,  
98 2012). The results of the present study indicate that, at least under certain circumstances, fibre size  
99 optimization may also operate within the lifetime of an individual.

100 The GH-axis is tightly coupled to the energy status of the fish and linked to feed intake via the  
101 expression of GH, IGF1 and their receptors (Raven et al., 2008). TR fish maintained a high GH output  
102 whilst experiencing a limitation in the supply of the amino acids and other nutrients required for  
103 growth. Our working hypothesis is that the uncoupling of the GH-axis from energy status directly  
104 affected some as yet unknown component of the signalling pathways regulating myotube formation

105 and hypertrophic growth, providing the stimulus for muscle fibre size optimization. GH-transgenics  
106 driven by the metallothionein-B promoter showed increased GH expression in all non-pituitary cell  
107 types including muscle and were not sensitive to the metabolic signals normally influencing  
108 endogenous GH regulation e.g. GH receptor expression was not increased with calorie restriction in  
109 TR as it was in WT (Raven et al., 2008). It is therefore possible that the effects of calorie restriction  
110 on fibre production differ between TR and WT fish, but this remains to be investigated. We found that  
111 the median fibre diameter was 20% higher in the TR than WT (Fig. 1B), expected to produce  
112 proportional energy savings in costs of ionic homeostasis. The energy saved could theoretically be  
113 reallocated to other aspects of the energy budget such as routine swimming activity, and may provide  
114 an explanation as to why TR fish were observed to exhibit much higher foraging activity whilst  
115 growing at a similar rate to WT fish fed the same diet.

116

## 117 MATERIAL AND METHODS

### 118 Fish

119 Coho salmon (*Oncorhynchus kisutch*) were reared in a containment facility at Fisheries and Oceans  
120 Canada, West Vancouver. Wild-type (WT) fish were from the 2010 brood of Chehalis River strain  
121 (BC, Canada). The strain M77 transgenic coho salmon was derived from Chehalis River strain  
122 produced using the OnMTGH1 construct as previously described (Leggatt et al., 2012). Fish were  
123 reared in fresh water at  $10 \pm 1^\circ\text{C}$  with a natural photoperiod, and fed commercial diet (Skretting,  
124 Vancouver, Canada). The 2011 brood of GH transgenics were fed to satiation thrice daily (TF group).  
125 The 2010 GH transgenics (TR group) were fed the same ration as the WT group, to produce similar  
126 body weights (Supplementary Table 1). Experiments were conducted meeting Canadian Council for  
127 Animal Care guidelines, and were approved by the Department of Fisheries and Oceans Pacific  
128 Region Animal Care Committee under Animal Use Protocol (#10-016). TF, TR and WT groups  
129 showed no significant differences in fork length (FL), however, body mass was significantly higher in  
130 the TF than WT group (Supplementary Table 1) ( $P < 0.05$ ) and condition factor ( $\text{Mass}/\text{FL}^3 \times 100$ ) was  
131 higher in the TF than either the TR or WT groups, reflecting differences in body shape (Fig. 1A). The  
132 total cross-sectional area of fast muscle at the position of the anal vent was not statistically different  
133 (Supplementary Table 1).

### 134 Muscle morphometry

135 A steak ~ 5 mm thick was made at the level of the anal vent. Three blocks were prepared to sample  
136 one entire half of the myotomal cross-section and frozen in isopentane (2-methyl butane) cooled to its  
137 freezing point in liquid nitrogen. Sections were stained with myosin ATPase to distinguish between

138 fibre types and hematoxylin-eosin for morphometric analysis (Johnston et al. 2012). Photographs of  
139 tissue sections were taken at a magnification of 200 times and 4 fields, selected at random, were  
140 photographed per block per fish. The cross-sectional areas of the entire fast muscle portion of the  
141 myotome and around 300 fast muscle fibres per block were digitised. In total, 800 fast muscle fibres  
142 were randomly selected per fish using a program written in R+ (<http://www.r-project.org/>) and smooth  
143 probability density functions (pdfs) fitted using a kernel function. The average smoothing parameter  
144 used (0.284) was similar between groups. Bootstrap techniques (n=1000) were used to distinguish  
145 underlying structure in the distributions from random variation. A non-parametric Kolmogorov-  
146 Smirnov two-sample test was used to test the null hypothesis that the probability density functions of  
147 groups were equal over all diameters (see Johnston et al. 2012). Data on fish size and muscle  
148 cellularity parameters was tested for normality (Shapiro-Wilk test) and equal variance and analysed  
149 using a one-way ANOVA with pairwise multiple comparisons by the Holm-Sidak method (overall  
150 significance level equal to 0.05).

### 151 **Gene expression analysis**

152 Pure fast muscle was dissected from dorsal epaxial myotomes. Total RNA extraction, quality analysis  
153 and concentration protocols were as described previously (Macqueen et al., 2013). Tissues were  
154 sampled at a similar time of day for 6 fish per group and the RNA stored at -80°C. A detailed  
155 description of the cDNA synthesis, primer design, qPCR reaction set-up, and data analysis is provided  
156 elsewhere (Macqueen et al., 2013) and Supplementary Table 2. Briefly, a total of 1µg of RNA from 6  
157 individuals for each of the treatments (WT, TF, TR) was reverse transcribed to cDNA using Quantitec  
158 reverse transcription kit (QIAGEN, Manchester, UK) including a gDNA removal step. Minus reverse  
159 transcriptase (-RT) was performed using 1µg of RNA from a pool created with RNA from all  
160 samples. 6µl per sample were mixed with 7.5µl of SensiFAST SYBR Lo-ROX 2X master mix  
161 (Bioline, London, UK) containing 400nM of sense/antisense primers. Reactions were performed in  
162 duplicate in a Mx3005P Thermocycler (Agilent; Berkshire, UK), with 1 cycle of 2 min at 95°C and  
163 x40 cycles of 5s 95°C and 20s at 65°C, followed by a dissociation curve analysis, which resulted in a  
164 single peak in all cases. The stability of the four housekeeping genes *rpl27*, *rpl13*, *ef1a* and *β-actin*  
165 was analysed as previously described (Macqueen et al. 2013). *Rpl13* and *ef1a* were found to be the  
166 most stable reference genes (M=0.058). Normalization of gene expression was performed using the  
167 geometric average of *rpl13* and *ef1a*. All expression values are expressed as arbitrary units.  
168 Expression between groups was compared using a one-way ANOVA with a Bonferroni post-hoc  
169 correction using SPSS21 statistical package (IBM).

170

### 171 **COMPETING INTERESTS**

172 The authors declare that they have no competing interest.

173

#### 174 AUTHOR CONTRIBUTIONS

175 IAJ and RHD conceived the study; RHD was responsible of fish husbandry and generation of the  
176 experimental groups. IAJ was responsible of the histological analysis. DGDLS was responsible of the  
177 RNA extraction and RT-qPCR analysis. IAJ and DGDLS carried out the statistical analysis. IAJ  
178 wrote the manuscript with input from the other authors.

179

#### 180 FUNDING

181 The study was supported by the Marine Alliance for Science and Technology for Scotland (Scottish  
182 Funding Council grant HR09011) and by the Canadian Biotechnology Strategy (RHD).

183

#### 184 REFERENCES

185 **Björnsson, B. T.** (1997) The biology of salmon growth hormone: from daylight to dominance. *Fish*  
186 *Physiology* **17**, 9-24.

187 **Hill, J. A., Kiessling, A., Devlin, R. H.** (2000) Coho salmon (*Oncorhynchus kisutch*) transgenic for a  
188 growth hormone gene construct exhibit increased rates of hyperplasia and detectable levels of  
189 differential gene expression. *Can. J. Aquat. Sci.* **57**, 939-950.

190 **Jimenez, A.G., Dillaman, R. M., Kinsey, S. T.** (2013) Large fibre size in skeletal muscle is  
191 metabolically advantageous. *Nature Communications* **4**, 2150, DOI: 10.1038.

192 **Johnston, I. A., Fernandez, D., Calvo, J., Vieira, V. L. A., North, T. W., Abercromby, M.,**  
193 **Garland, T. Jr.** (2003) Reduction in muscle fibre number during the adaptive radiation of  
194 Notothenioid fishes: a phylogenetic perspective. *J. Exp. Biol.* **206**, 2595-2609.

195 **Johnston, I. A., Bower, N. I., Macqueen, D. J.** (2011) Growth and the regulation of myotomal  
196 muscle mass in teleost fish. *J. Exp. Biol.* **214**, 1617-1628.

197 **Johnston, I. A., Kristjánsson, B. K., Paxton, C. G., Vieira, V. L. A., Macqueen, D. J., Bell, M. A.**  
198 (2012) Universal scaling rules predict evolutionary patterns of myogenesis in species with  
199 indeterminate growth. *Proc. R. Soc. B.* **279**, 2255-61.

200 **Leggatt, R., Biagi, C.A., Smith, J. L., Devlin, R. H.** (2012) Growth of growth hormone transgenic  
 201 coho salmon *Oncorhynchus kisutch* is influenced by construct promoter type and family line.  
 202 *Aquaculture* **356–357**, 193–199.

203 **Macqueen, D. J., Garcia de la serrana, D., Johnston, I. A.** (2013) Evolution of ancient functions in  
 204 the vertebrate insulin-like growth factor system uncovered by study of duplicated salmonid fish  
 205 genomes. *Mol. Biol. Evol.* **30**, 1060-1076.

206 **Raven, P. A., Uh, M., Sakhrani, D., Beckman, B. R., Cooper, K., Pinter, J., Leder, E. H.,**  
 207 **Silverstein, J., Devlin, R. H.** (2008) Endocrine effects of growth hormone overexpression in  
 208 transgenic coho salmon. *Gen. Comp. Endocrinol.* **159**, 26-37.

209 **Sundstrom, L. F., Devlin, R. H., Johnsson, J. I., Biagi, C. A.** (2003) Vertical position reflects  
 210 increased feeding motivation in growth hormone transgenic coho salmon (*Oncorhynchus Kisutch*).  
 211 *Ethology*, **109**, 701-712.

212

## 213 **FIGURE LEGENDS**

214 **Figure 1. Analysis of muscle growth patterns in Coho salmon (*Oncorhynchus kisutch*).**

215 (A) WT, wild type; TF, Growth-hormone (GH) transgenics fed to satiation; TR, calorie-restricted GH-  
 216 transgenics growing at the WT rate. (B) Relationship between fibre number and fish length. WT  
 217 (closed triangles), TF (closed circles) and TR (open circles). Lines were fitted by least squares  
 218 regression. (C) Probability density functions (pdfs) of muscle fibre diameter. The dashed lines  
 219 represent the average pdfs of groups and the solid line the pdf of the combined groups. The shaded  
 220 area represents the 1000 bootstraps of the combined group. (D) Percentiles of fibre diameter for WT,  
 221 TF and TR groups. Values represent Mean  $\pm$  SE.

222 **Figure 2. Gene expression analysis in coho salmon (*Oncorhynchus kisutch*) fast skeletal muscle.**

223 Gene expression in fast skeletal muscle measured by qPCR for *gh*, *igf1*, *dock5*, *dock1*, *cadherin-15*,  
 224 *tmem8c*, *itgb1* and *crkl* (see Supplementary Table 2 for abbreviations). Results represent Mean  $\pm$  SE,  
 225 6 fish per group. Different letters indicate differences between means ( $p < 0.05$ ).

226



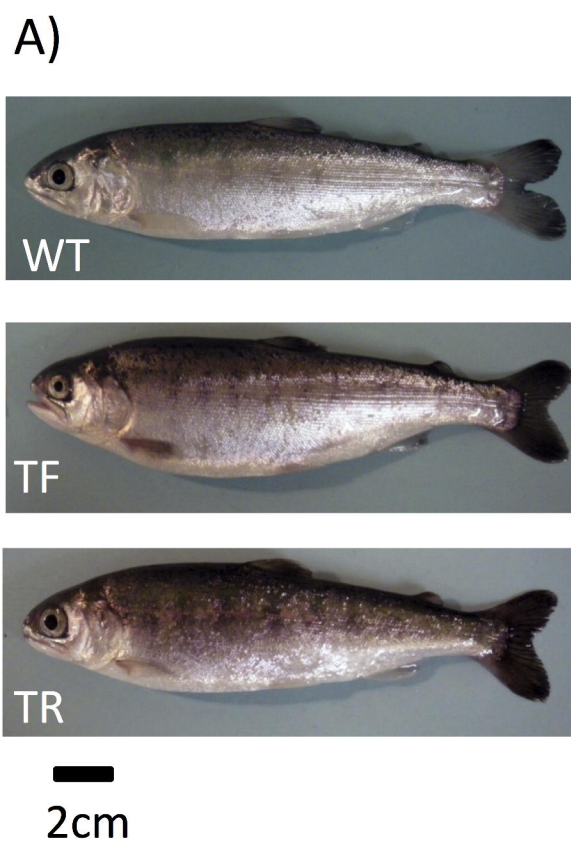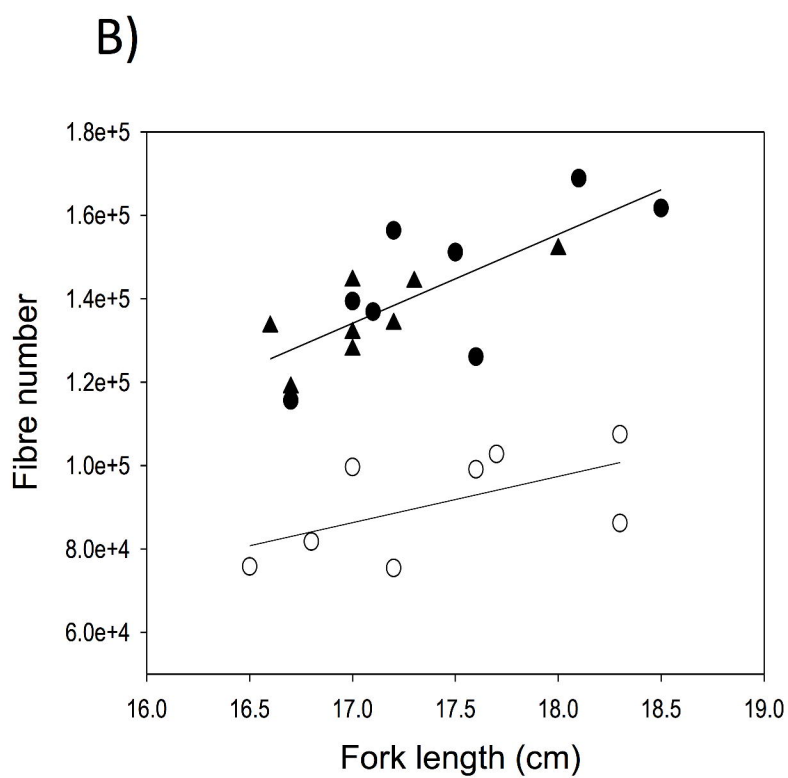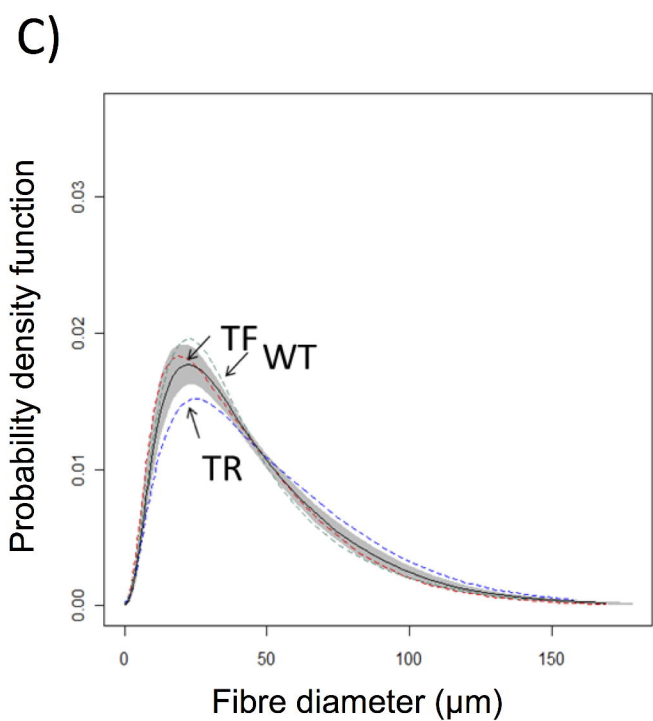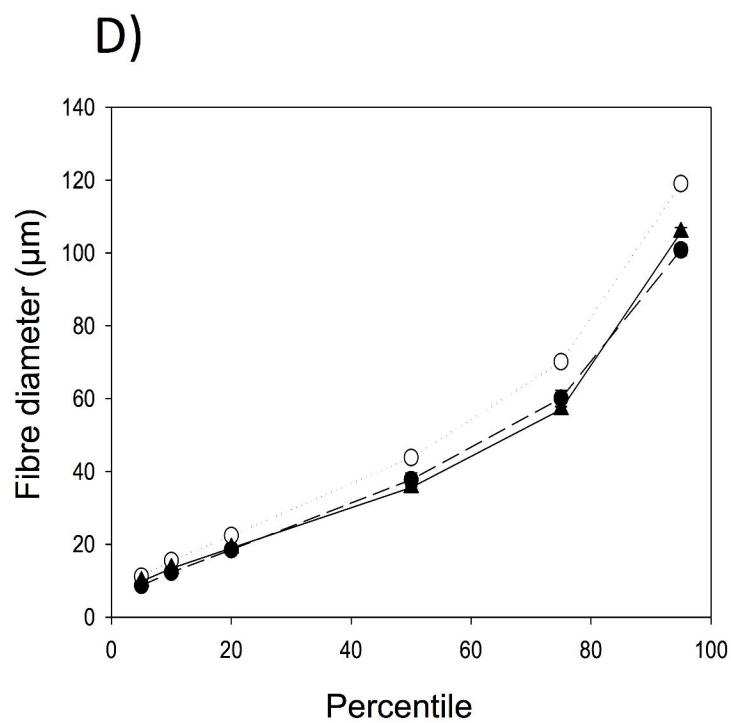

Fig.1

A)

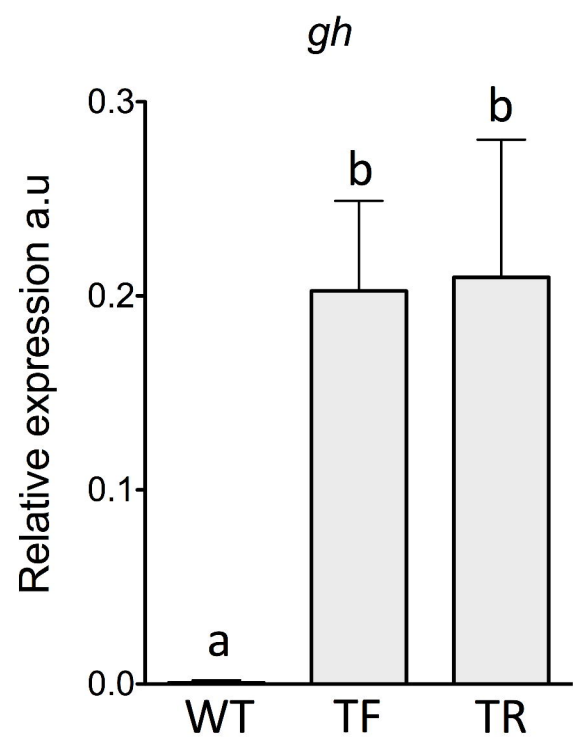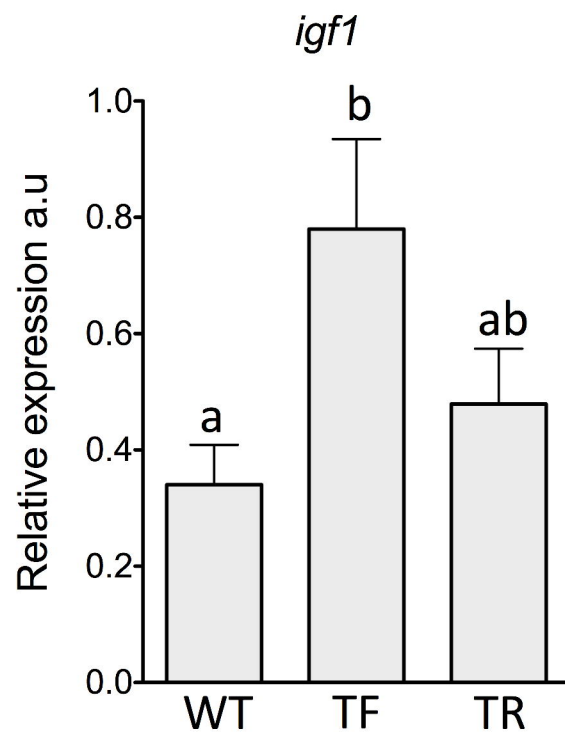

B)

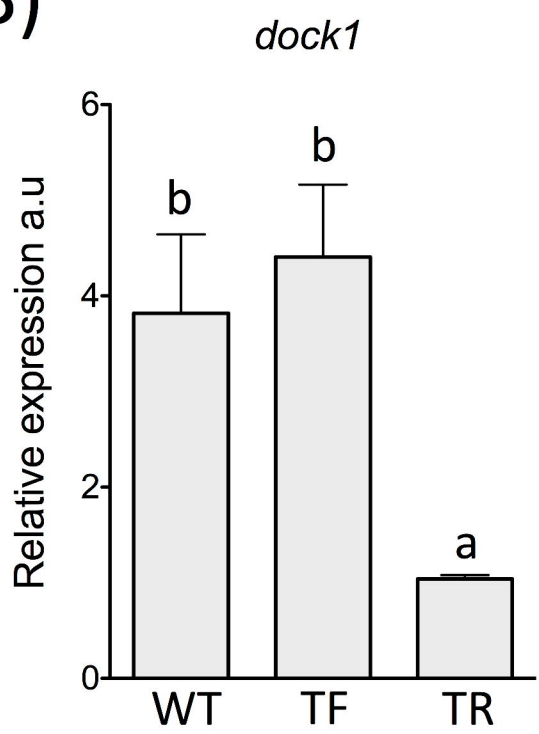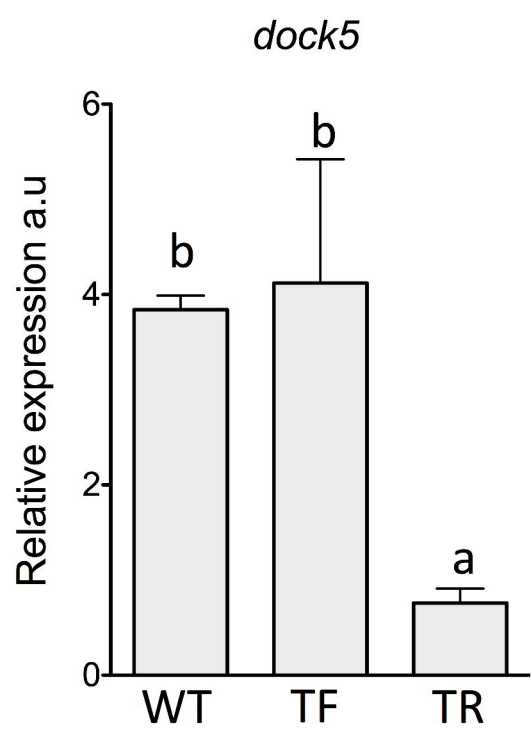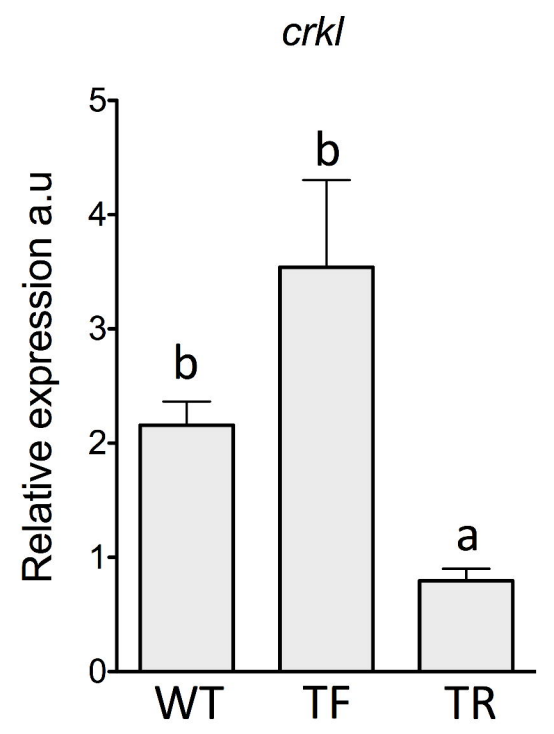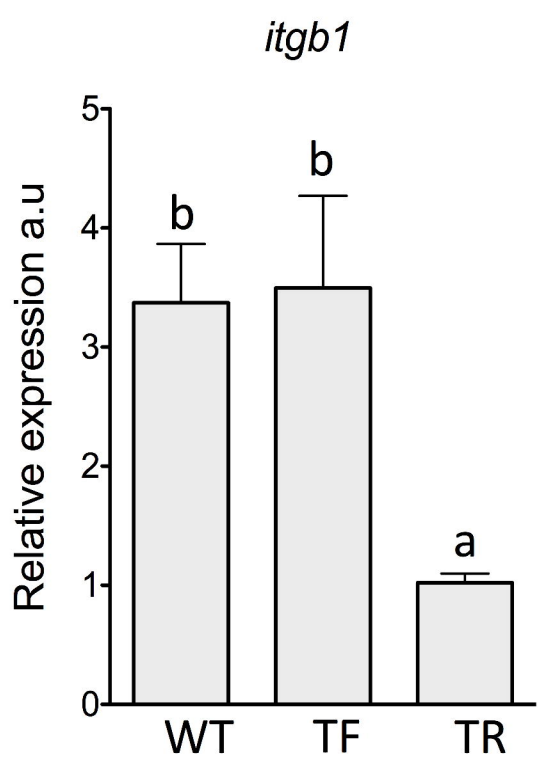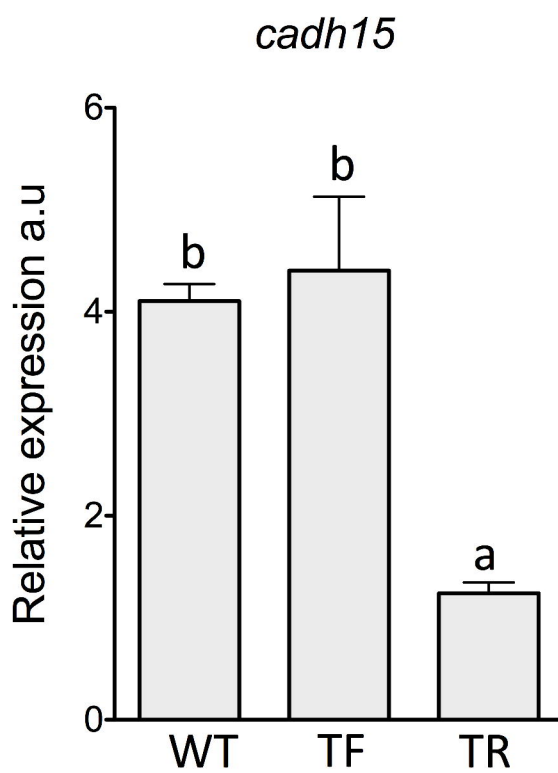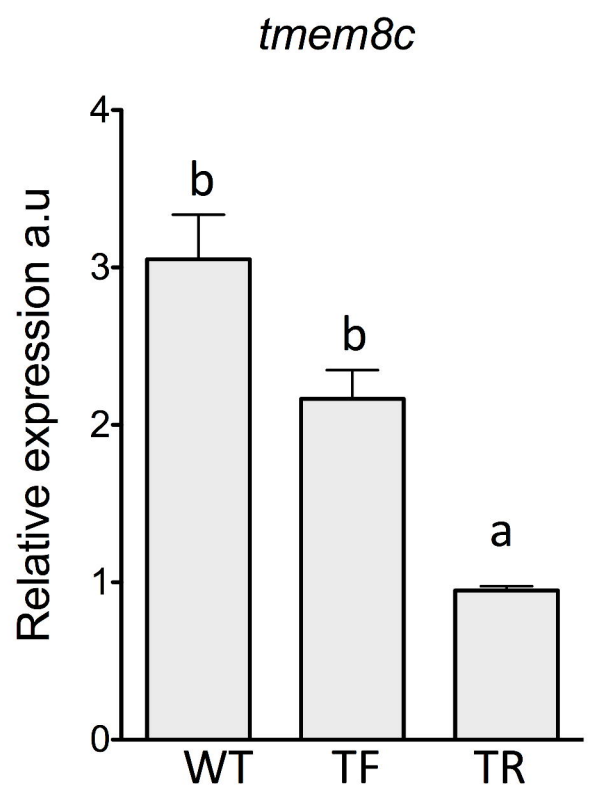

Fig.2
